# Supplementary material for: Transcriptional signatures of unfolded protein response implicate the limitation of animal models in pathophysiological studies
Source: PubMed Central journal article supplement — Environ Dis. Author manuscript; Available in PMC 2017 Apr 14. (PMC5336312; doi:10.4103/2468-5690.180333), 2016-04-14
Supplement: NIHMS811511-supplement-Supplemental_information.pdf [file NIHMS811511-supplement-Supplemental_information.pdf]

1. BIP

Grey shade - Identical amino acid sequences

Yellow shade - Nucleotide-binding domain

|            |                            |                            |                          |          |     |
|------------|----------------------------|----------------------------|--------------------------|----------|-----|
| Hm BIP 1   | MKLSLVAAMLLLSAARAEEDKEDV   | GTVVGIDLGTTCYSCVGFNKRVEI   | IANDQGNR                 | 60       |     |
| Ms BIP 2   | MKLSLVAAMLLLSAARAEEDKEDV   | GTVVGIDLGTTCYSCVGFNKRVEI   | IANDQGNR                 | 61       |     |
| Hm BIP 61  | ITPSYVAFTEPEGERLIGDAAKNQLT | SNPENTVFDAKRLIGRTWNPDSVQ   | QDQIKLPPFKVV             | 120      |     |
| Ms BIP 122 | ITPSYVAFTEPEGERLIGDAAKNQLT | SNPENTVFDAKRLIGRTWNPDSVQ   | QDQIKLPPFKVV             | 121      |     |
| Hm BIP 121 | EKKTKPYIQVDIGGGQTKTFAP     | EIISAMVLRKMKETAAYLGKVKTHAV | VTVPAIFNDQA              | 180      |     |
| Ms BIP 182 | EKKTKPYIQVDIGGGQTKTFAP     | EIISAMVLRKMKETAAYLGKVKTHAV | VTVPAIFNDQA              | 181      |     |
| Hm BIP 181 | ROATKDAGTIAGLNMVRIINEP     | TAAAYGLDKRREGEKNI          | LVFDLGGGTFVDSLLTIDNG     | 240      |     |
| Ms BIP 242 | ROATKDAGTIAGLNMVRIINEP     | TAAAYGLDKRREGEKNI          | LVFDLGGGTFVDSLLTIDNG     | 241      |     |
| Hm BIP 241 | VFEVATNGDTHLGGEDFDQR       | VMHEPFIKLYKTKTKGDKV        | RKDNRAVQKLRREVEKAKRAL    | 300      |     |
| Ms BIP 242 | VFEVATNGDTHLGGEDFDQR       | VMHEPFIKLYKTKTKGDKV        | RKDNRAVQKLRREVEKAKRAL    | 301      |     |
| Hm BIP 301 | SOHOARIEIESFEGEDFSETL      | TRAKFEELNMDLFRSTMKPVQK     | VLSDKSKSDIDEIV           | 360      |     |
| Ms BIP 302 | SOHOARIEIESFEGEDFSETL      | TRAKFEELNMDLFRSTMKPVQK     | VLSDKSKSDIDEIV           | 361      |     |
| Hm BIP 361 | LVGGSTRIPKIQQLVKEFNG       | KPEFRSGINPDEAVYGA          | VAQVQVLSGDDQDGLVLLDVC    | 420      |     |
| Ms BIP 362 | LVGGSTRIPKIQQLVKEFNG       | KPEFRSGINPDEAVYGA          | VAQVQVLSGDDQDGLVLLDVC    | 421      |     |
| Hm BIP 421 | PLTGLIEVGGVMTKILPR         | NTVPTKKSQIFSTADSNQ         | PVTIKVYGERPLTKDNHLLG     | 480      |     |
| Ms BIP 422 | PLTGLIEVGGVMTKILPR         | NTVPTKKSQIFSTADSNQ         | PVTIKVYGERPLTKDNHLLG     | 481      |     |
| Hm BIP 441 | TFDLTGIPAPRGVQIEV          | TFEIDVNGILRVTAEDK          | TGNKNIITINDQNR           | LTPEEIER | 540 |
| Ms BIP 442 | TFDLTGIPAPRGVQIEV          | TFEIDVNGILRVTAEDK          | TGNKNIITINDQNR           | LTPEEIER | 541 |
| Hm BIP 541 | MVNDAEKFAEDKLLKER          | IDTRNELESYAYSLK            | QIDGKELGKLSSEDKETMEKAVEE | 600      |     |
| Ms BIP 542 | MVNDAEKFAEDKLLKER          | IDTRNELESYAYSLK            | QIDGKELGKLSSEDKETMEKAVEE | 601      |     |
| Hm BIP 601 | KIEWLESHQDADIEDPK          | KAKKLEEEIQPIISK            | LYSAGPPPTGEEDTARKDEL     | 654      |     |
| Ms BIP 602 | KIEWLESHQDADIEDPK          | KAKKLEEEIQPIISK            | LYSAGPPPTGEEDTARKDEL     | 655      |     |

2. ATP6

Grey shade - Identical amino acid sequences

Yellow shade - Transcription activation domain

Green shade - B-zip domain

|             |                 |                |                  |                |              |              |     |
|-------------|-----------------|----------------|------------------|----------------|--------------|--------------|-----|
| Hm ATP6 1   | MESPPSPGLFHRLED | WDSALFAELGYFTD | TDELEAENFIYENNFD | NLDLDDLMPWE    | 70           |              |     |
| Ms ATP6 1   | MESPPSPGLFHRLED | WDSALFAELGYFTD | TDELEAENFIYENNFD | NLDLDDLMPWE    | 60           |              |     |
| Hm ATP6 71  | SDIWINNOICTVK   | IKAEQPLSPASSSV | SSPRSDSSTQHV     | PEELDLSSSQS    | 130          |              |     |
| Ms ATP6 61  | SDIWINNOICTVK   | IKAEQPLSPASSSV | SSPRSDSSTQHV     | PEELDLSSSQS    | 118          |              |     |
| Hm ATP6 131 | PLSYGNSNSLSA    | EAPLKEKDPVTPGR | NKTEENGLTPKKIQV  | NSKPSIQPKLLPAA | 190          |              |     |
| Ms ATP6 119 | PLSYGNSNSLSA    | EAPLKEKDPVTPGR | NKTEENGLTPKKIQV  | NSKPSIQPKLLPAA | 177          |              |     |
| Hm ATP6 191 | KTQTNSSVPAK     | IIQTPTLPA      | MLAKQOPIISLQ     | PAPTRGQTVLLSQ  | PTVQLQAVLP   | 250          |     |
| Ms ATP6 178 | KTQTNSSVPAK     | IIQTPTLPA      | MLAKQOPIISLQ     | PAPTRGQTVLLSQ  | PTVQLQAVLP   | 237          |     |
| Hm ATP6 251 | SAQPLVAVAGG     | VTVLPHVNVV     | PAPSANVPGKLS     | VTKPVQLSTMR    | NVGSIAVLR    | 310          |     |
| Ms ATP6 238 | SAQPLVAVAGG     | VTVLPHVNVV     | PAPSANVPGKLS     | VTKPVQLSTMR    | NVGSIAVLR    | 297          |     |
| Hm ATP6 311 | QRMIKRESAC      | QRKKEVYMLGL    | EARLKAALSEN      | BOLKKEGNIKRL   | EVVSENQRKL   | 370          |     |
| Ms ATP6 298 | QRMIKRESAC      | QRKKEVYMLGL    | EARLKAALSEN      | BOLKKEGNIKRL   | EVVSENQRKL   | 357          |     |
| Hm ATP6 371 | VSPKRRVVC       | MIVLAFIIL      | INYPGMSMLE       | QDSRRMNP       | SVSPANORHLLG | FSKAEQDTS    | 430 |
| Ms ATP6 358 | VSPKRRVVC       | MIVLAFIIL      | INYPGMSMLE       | QDSRRMNP       | SVSPANORHLLG | FSKAEQDTS    | 417 |
| Hm ATP6 431 | DGIIQKNSY       | RYDHSVNDK      | ALMVLTEPELLY     | IPPPCQPLINT    | TESLRNLH     | ELRGVHRH     | 490 |
| Ms ATP6 418 | DGIIQKNSY       | RYDHSVNDK      | ALMVLTEPELLY     | IPPPCQPLINT    | TESLRNLH     | ELRGVHRH     | 477 |
| Hm ATP6 491 | EVERTKSR        | RMNTNQQKTR     | ILQALQEG         | QNSQLMAVQY     | TETTSSISR    | NSGSELQVYASR | 550 |
| Ms ATP6 478 | EVERTKSR        | RMNTNQQKTR     | ILQALQEG         | QNSQLMAVQY     | TETTSSISR    | NSGSELQVYASR | 536 |
| Hm ATP6 551 | SYQDFE          | AIRRRGDTF      | YVVSFRD          | HLLPATTHNKT    | TRPKMSIVL    | PAININ       | 510 |
| Ms ATP6 498 | SYQDFE          | AIRRRGDTF      | YVVSFRD          | HLLPATTHNKT    | TRPKMSIVL    | PAININ       | 510 |
| Hm ATP6 611 | EVMMQIDC        | QVMDTRILH      | IKSSVPPYLR       | DQQRQNTFF      | GGPPAATE     | THVSTIPESLQ  | 670 |
| Ms ATP6 598 | EVMMQIDC        | QVMDTRILH      | IKSSVPPYLR       | DQQRQNTFF      | GGPPAATE     | THVSTIPESLQ  | 656 |

3. IRE1r

Grey shade - Identical amino acid sequences

Yellow shade - Luminal dimerization domain

Green shade - Catalytic domain

|             |           |             |         |            |          |               |     |
|-------------|-----------|-------------|---------|------------|----------|---------------|-----|
| Hm IRE1a 20 | FGSTSTVTL | PETLLEFVSLD | SGSLHVA | SRRTGSKRWL | KEDPVLQV | PTHVEEPAFLDPD | 79  |
| Ms IRE1a 22 | FGSTSTVTL | PETLLEFVSLD | SGSLHVA | SRRTGSKRWL | KEDPVLQV | PTHVEEPAFLDPD | 81  |
| Hm IRE1a 80 | GSYTLGK   | KNKNGLTKL   | PFTTPEL | VQASPCRS   | DGILYMK  | QKDIWYV       | 139 |
| Ms IRE1a 82 | GSYTLGK   | KNKNGLTKL   | PFTTPEL | VQASPCRS   | DGILYMK  | QKDIWYV       | 141 |

|              |                    |               |             |          |          |     |
|--------------|--------------------|---------------|-------------|----------|----------|-----|
| Hm IRE1a140  | SSAFADSLCPSTSLYLGR | TEXTITMDYDKTR | RELNRNATYFD | YASLPEDD | VDYKMSHV | 199 |
| Ms IRE1a 142 | SSAFADSLCPSTSLYLGR | TEXTITMDYDKTR | RELNRNATYFD | YASLPEDD | VDYKMSHV | 201 |
| Hm IRE1a200  | SNDDGLVVT          | YDSESDGLV     | QIYQYASV    | VVAVYV   | WQGVSR   | 259 |
| Ms IRE1a 202 | SNDDGLVVT          | YDSESDGLV     | QIYQYASV    | VVAVYV   | WQGVSR   | 261 |
| Hm IRE1a260  | VGRITKWKY          | FPFPEAKSKL    | TPFLVYK     | YKTSYLS  | VASV     | 319 |
| Ms IRE1a 262 | VGRITKWKY          | FPFPEAKSKL    | TPFLVYK     | YKTSYLS  | VASV     | 321 |
| Hm IRE1a320  | QTDGVTG            | DGKGCVITP     | STDPVDF     | PKSKNKL  | NLYRNYLL | 379 |
| Ms IRE1a 322 | QTDGVTG            | DGKGCVITP     | STDPVDF     | PKSKNKL  | NLYRNYLL | 381 |
| Hm IRE1a380  | PNNLKH             | RENVIPADSEK   | SFEV        | INLVQ    | TSNAPT   | 439 |
| Ms IRE1a 382 | PNNLKH             | RENVIPADSEK   | SFEV        | INLVQ    | TSNAPT   | 441 |
| Hm IRE1a440  | MLKMATI            | ITLSTFL       | LGVAFIT     | ITP      | SLM      | 499 |
| Ms IRE1a 442 | MLKMATI            | ITLSTFL       | LGVAFIT     | ITP      | SLM      | 499 |
| Hm IRE1a500  | PGD                | TADQ          | GLLDT       | SGP      | YSESS    | 559 |
| Ms IRE1a 500 | PGD                | TADQ          | GLLDT       | SGP      | YSESS    | 559 |
| Hm IRE1a560  | ETS                | VIVG          | KIS         | CPK      | VDL      | 619 |
| Ms IRE1a 560 | ETS                | VIVG          | KIS         | CPK      | VDL      | 619 |
| Hm IRE1a620  | DEHNV              | RYE           | CTE         | KRQ      | FOY      | 679 |
| Ms IRE1a 620 | DEHNV              | RYE           | CTE         | KRQ      | FOY      | 679 |
| Hm IRE1a680  | HSLN               | VHRD          | KPHN        | IL       | SM       | 739 |
| Ms IRE1a 680 | HSLN               | VHRD          | KPHN        | IL       | SM       | 739 |
| Hm IRE1a740  | FEH                | SEK           | NET         | YV       | IP       | 799 |
| Ms IRE1a 740 | FEH                | SEK           | NET         | YV       | IP       | 799 |
| Hm IRE1a800  | HEV                | IARE          | LE          | TK       | AM       | 859 |
| Ms IRE1a 800 | HEV                | IARE          | LE          | TK       | AM       | 859 |
| Hm IRE1a860  | QL                 | REG           | RAV         | V        | K        | 919 |
| Ms IRE1a 860 | QL                 | REG           | RAV         | V        | K        | 919 |
| Hm IRE1a920  | ETL                | GS            | L           | P        | D        | 977 |
| Ms IRE1a 920 | ETL                | GS            | L           | P        | D        | 977 |

4. IRE1t

Grey shade - Identical amino acid sequences

Yellow shade - Luminal dimerization domain

Green shade - Catalytic domain

|             |      |     |   |   |   |   |   |   |   |   |   |   |   |   |   |   |   |   |   |   |   |   |   |   |     |     |
|-------------|------|-----|---|---|---|---|---|---|---|---|---|---|---|---|---|---|---|---|---|---|---|---|---|---|-----|-----|
| Hm IRE1t49  | MASV | RGS | R | W | P | R | L | Q | L | Q | F | A | L | L | G | T | S | P | O | V | H | T | L | R | 108 |     |
| Ms IRE1t 1  | MAR  | V   | P | Q | L | S | P | L | F | L | Q | L | L | L | L | L | L | L | L | L | L | L | L | L | 59  |     |
| Hm IRE1t109 | K    | W   | T | L | D | D | D | D | D | D | D | D | D | D | D | D | D | D | D | D | D | D | D | D | 168 |     |
| Ms IRE1t160 | K    | W   | T | L | D | D | D | D | D | D | D | D | D | D | D | D | D | D | D | D | D | D | D | D | 119 |     |
| Hm IRE1t169 | D    | G   | V | F | T | G | R | O | D | A | N | F | V | D | P | E | S | G | T | O | M | L | T | T | E   | 228 |
| Ms IRE1t120 | D    | G   | V | F | T | G | R | O | D | A | N | F | V | D | P | E | S | G | T | O | M | L | T | T | E   | 179 |
| Hm IRE1t229 | T    | Y   | R | S | A | F | M | D | G | S | P | G | K | Y | M | L | S | H | L | S | C | M | G | L | L   | 239 |
| Ms IRE1t180 | T    | Y   | R | S | A | F | M | D | G | S | P | G | K | Y | M | L | S | H | L | S | C | M | G | L | L   | 239 |
| Hm IRE1t289 | R    | Q   | L | P | H | L | T | A | R | D | T | L | H | L | R | W | H | I | L | P | A | S | G | P | R   | 348 |
| Ms IRE1t240 | R    | Q   | L | P | H | L | T | A | R | D | T | L | H | L | R | W | H | I | L | P | A | S | G | P | R   | 299 |
| Hm IRE1t349 | K    | A   | L | V | H | G | V | A | L | P | R | G | L | T | A | D | G | P | T | D | E | V | L | O | S   | 408 |
| Ms IRE1t300 | K    | A   | L | V | H | G | V | A | L | P | R | G | L | T | A | D | G | P | T | D | E | V | L | O | S   | 359 |
| Hm IRE1t409 | G    | H   | E | L | P | V | L | H | T | T | L | R | V | H | T | L | S | G | O | A | T | R | P | P | T   | 416 |
| Ms IRE1t360 | G    | H   | E | L | P | V | L | H | T | T | L | R | V | H | T | L | S | G | O | A | T | R | P | P | T   | 416 |
| Hm IRE1t469 | T    | P   | S | Y | L | G | L | G | P | D | L | A | S | L | T | A | V | L | L | G | W | I | F | V | M   | 528 |
| Ms IRE1t417 | T    | P   | S | Y | L | G | L | G | P | D | L | A | S | L | T | A | V | L | L | G | W | I | F | V | M   | 468 |
| Hm IRE1t529 | S    | L   | H | S | A | R | R | S | R | K | L | S | L | S | P | K | A | Q | P | L | D | D | E | A | L   | 588 |
| Ms IRE1t469 | Q    | L   | S | R | I | L | D | Q | R | R | F | S | P | E | A | P | H | D | E | A | Q | P | T | V | V   | 528 |
| Hm IRE1t589 | G    | R   | A | V | A | V | K | R | L | E | C | F | G | V | R | R | V | L | Q | S | D | R | H | N | V   | 648 |
| Ms IRE1t529 | G    | R   | A | V | A | V | K | R | L | E | C | F | G | V | R | V | L | Q | S | D | R | H | N | V | 588 |     |
| Hm IRE1t649 | V    | H   | N | P | H | L | R | E | P | V | L | Q | S | L | H | S | H | I | R | H | L | R | K | N | I   | 708 |
| Ms IRE1t589 | V    | H   | N | P | H | L | R | E | P | V | L | Q | S | L | H | S | H | I | R | H | L | R | K | N | I   | 648 |
| Hm IRE1t709 | G    | L   | C | K | L | P | A | G | R | C | S | F | S | L | H | S | C | P | T | G | M | A | P | L | L   | 768 |
| Ms IRE1t649 | G    | L   | C | K | L | P | A | G | R | C | S | F | S | L | H | S | C | P | T | G | M | A | P | L | L   | 707 |
| Hm IRE1t769 | S    | H   | F | P | E | S | L | S | L | S | L | S | L | S | L | S | L | S | L | S | L | S | L | S | L   | 828 |
| Ms IRE1t708 | S    | H   | F | P | E | S | L | S | L | S | L | S | L | S | L | S | L | S | L | S | L | S | L | S | L   | 767 |
| Hm IRE1t829 | W    | S   | R | A | K | L | P | O | F | D | D | S | D | L | E | K | S | E | S | P | L | V | R | A | L   | 888 |
| Ms IRE1t768 | W    | S   | R | A | K | L | P | O | F | D | D | S | D | L | E | K | S | E | S | P | L | V | R | A | L   | 827 |
| Hm IRE1t889 | Y    | K   | T | S | V | R | L | R | A | V | N | K | K | H | H | Y | E | L | P | V | E | R | V | Q | A   | 948 |
| Ms IRE1t828 | Y    | K   | T | S | V | R | L | R | A | V | N | K | K | H | H | Y | E | L | P | V |   |   |   |   |     |     |



**Supplementary Table 1: The full matrix of the unfolded protein response gene expression profiles in 26 tissues or organs of human and mouse species. Fold changes of gene expression levels in human or mouse tissues were determined by normalization to expression levels of the genes in cerebellum. The expression levels of individual genes in cerebellum were defined as 1**

|                     | BIP   | ATF6 | ERN1  | ERN2   | XBP1  | PERK | EIF2a | ATF4 | CHOP | GADD34 |
|---------------------|-------|------|-------|--------|-------|------|-------|------|------|--------|
| Human               |       |      |       |        |       |      |       |      |      |        |
| Cerebellum          | 1.00  | 1.00 | 1.00  | 1.00   | 1.00  | 1.00 | 1.00  | 1.00 | 1.00 | 1.00   |
| Hypothalamus        | 4.74  | 1.28 | 1.33  | 0.79   | 0.81  | 1.60 | 1.36  | 1.64 | 1.52 | 1.26   |
| Pituitary           | 10.30 | 1.60 | 1.43  | 1.17   | 3.64  | 2.59 | 1.41  | 1.21 | 1.49 | 1.95   |
| Olfactory bulb      | 13.53 | 0.96 | 0.97  | 0.70   | 0.74  | 1.22 | 1.03  | 1.65 | 1.33 | 3.71   |
| Retina              | 3.96  | 1.48 | 1.48  | 0.87   | 1.62  | 1.89 | 1.50  | 1.53 | 1.87 | 1.90   |
| Spinal cord         | 3.44  | 1.30 | 1.30  | 0.85   | 0.71  | 1.32 | 1.33  | 1.35 | 1.67 | 1.60   |
| Dorsa root ganglion | 1.41  | 0.96 | 0.96  | 0.68   | 0.53  | 1.09 | 1.04  | 0.64 | 0.96 | 1.01   |
| Bone marrow         | 2.59  | 1.26 | 1.23  | 0.84   | 3.79  | 1.33 | 1.05  | 0.91 | 1.23 | 3.42   |
| Lymph node          | 3.72  | 1.10 | 1.07  | 0.76   | 4.12  | 3.08 | 0.87  | 1.46 | 1.05 | 1.46   |
| Amygdala            | 3.50  | 1.26 | 1.26  | 0.76   | 0.97  | 3.89 | 1.28  | 0.61 | 1.19 | 1.40   |
| Adrenal gland       | 2.43  | 1.05 | 1.04  | 0.85   | 2.15  | 1.61 | 1.05  | 1.13 | 1.22 | 1.46   |
| Salivary gland      | 2.57  | 0.99 | 0.99  | 0.71   | 14.70 | 3.05 | 1.08  | 1.88 | 1.00 | 0.98   |
| Adipose tissue      | 4.71  | 1.20 | 1.22  | 0.77   | 1.25  | 1.18 | 1.63  | 1.74 | 1.19 | 1.44   |
| Pancreas            | 4.82  | 1.06 | 0.99  | 0.76   | 7.98  | 3.14 | 1.01  | 1.95 | 1.05 | 3.19   |
| Small intestine     | 6.55  | 1.36 | 1.17  | 0.65   | 10.39 | 2.85 | 1.25  | 1.16 | 0.23 | 1.19   |
| Large intestine     | 6.42  | 1.34 | 1.23  | 0.91   | 7.70  | 4.36 | 1.17  | 1.35 | 0.29 | 1.34   |
| Liver               | 6.46  | 2.02 | 2.19  | 0.96   | 21.41 | 1.76 | 1.16  | 1.24 | 1.47 | 3.16   |
| Kidney              | 1.66  | 1.06 | 1.01  | 0.70   | 1.30  | 0.98 | 0.84  | 0.45 | 1.30 | 1.09   |
| Heart               | 1.21  | 1.70 | 1.58  | 1.06   | 2.10  | 1.75 | 1.19  | 0.46 | 1.43 | 3.14   |
| Skeletal muscle     | 0.97  | 1.58 | 1.46  | 1.12   | 1.09  | 1.66 | 1.68  | 2.74 | 1.48 | 1.48   |
| Lung                | 4.07  | 1.34 | 1.35  | 0.78   | 9.23  | 1.34 | 0.79  | 2.53 | 1.00 | 14.05  |
| Prostate            | 6.78  | 1.36 | 1.43  | 1.10   | 27.92 | 6.15 | 1.14  | 2.30 | 0.63 | 2.23   |
| Uterus              | 4.73  | 1.02 | 1.00  | 0.61   | 3.36  | 2.18 | 1.08  | 1.61 | 0.61 | 2.23   |
| Ovary               | 2.55  | 0.89 | 0.81  | 0.54   | 1.19  | 0.90 | 0.96  | 0.85 | 0.76 | 1.09   |
| Placenta            | 11.19 | 1.42 | 1.35  | 0.88   | 13.30 | 3.29 | 0.92  | 2.52 | 1.16 | 3.73   |
| Testis              | 3.67  | 1.09 | 1.04  | 0.70   | 0.92  | 0.94 | 1.10  | 0.65 | 1.11 | 1.15   |
| Mouse               |       |      |       |        |       |      |       |      |      |        |
| Cerebellum          | 1.00  | 1.00 | 1.00  | 1.00   | 1.00  | 1.00 | 1.00  | 1.00 | 1.00 | 1.00   |
| Hypothalamus        | 1.15  | 0.45 | 1.07  | 1.22   | 0.78  | 0.78 | 1.09  | 0.80 | 0.94 | 0.41   |
| Pituitary           | 2.15  | 0.96 | 6.74  | 0.98   | 2.03  | 1.76 | 1.32  | 1.13 | 1.34 | 1.58   |
| Olfactory bulb      | 0.61  | 0.91 | 0.92  | 0.98   | 0.55  | 0.85 | 0.97  | 0.84 | 1.23 | 0.85   |
| Retina              | 0.94  | 1.05 | 1.95  | 0.98   | 0.19  | 0.95 | 0.60  | 1.53 | 0.82 | 0.22   |
| Spinal cord         | 0.82  | 0.70 | 1.03  | 0.98   | 0.38  | 0.86 | 0.96  | 0.86 | 0.77 | 0.44   |
| Dorsa root ganglion | 0.79  | 0.87 | 1.02  | 0.99   | 0.52  | 1.16 | 1.86  | 0.93 | 1.38 | 1.32   |
| Bone marrow         | 1.52  | 1.02 | 2.24  | 0.98   | 0.65  | 1.26 | 3.25  | 1.07 | 3.10 | 39.17  |
| Lymph node          | 1.26  | 1.15 | 2.03  | 0.98   | 0.90  | 1.43 | 2.93  | 0.71 | 1.55 | 1.95   |
| Amygdala            | 0.59  | 0.71 | 0.91  | 0.98   | 0.43  | 0.74 | 1.29  | 0.68 | 0.66 | 0.29   |
| Adrenal gland       | 0.88  | 1.19 | 12.50 | 0.99   | 0.71  | 0.86 | 1.15  | 1.02 | 5.54 | 3.49   |
| Salivary gland      | 2.10  | 2.36 | 5.35  | 1.50   | 3.83  | 2.21 | 1.54  | 2.09 | 2.73 | 1.06   |
| Adipose tissue      | 1.69  | 1.38 | 3.00  | 0.98   | 1.31  | 0.97 | 1.79  | 0.81 | 1.25 | 0.71   |
| Pancreas            | 1.64  | 3.91 | 6.81  | 1.69   | 5.33  | 3.90 | 1.63  | 2.60 | 1.02 | 0.65   |
| Small intestine     | 1.86  | 1.53 | 2.26  | 38.23  | 1.65  | 1.37 | 1.99  | 1.05 | 1.66 | 0.29   |
| Large intestine     | 1.33  | 1.51 | 2.14  | 304.80 | 1.24  | 1.46 | 1.60  | 0.80 | 1.26 | 0.85   |
| Liver               | 2.54  | 3.17 | 5.14  | 1.22   | 1.80  | 0.85 | 2.24  | 0.81 | 0.50 | 0.82   |
| Kidney              | 1.44  | 1.38 | 1.49  | 1.00   | 0.92  | 0.99 | 1.54  | 0.69 | 0.82 | 0.45   |
| Heart               | 1.34  | 5.19 | 1.40  | 0.98   | 0.65  | 0.71 | 1.66  | 0.78 | 1.00 | 1.39   |
| Skeletal muscle     | 0.75  | 1.15 | 1.17  | 2.51   | 0.46  | 1.00 | 2.16  | 1.09 | 0.81 | 2.45   |
| Lung                | 1.53  | 1.88 | 1.90  | 0.98   | 1.54  | 1.02 | 1.28  | 1.05 | 1.48 | 4.62   |
| Prostate            | 2.73  | 2.67 | 5.41  | 0.98   | 2.01  | 2.76 | 2.04  | 0.82 | 1.39 | 0.76   |
| Uterus              | 1.00  | 1.00 | 2.38  | 0.98   | 1.14  | 0.88 | 2.23  | 0.83 | 1.02 | 1.69   |
| Ovary               | 1.42  | 1.18 | 3.45  | 0.98   | 0.85  | 0.88 | 2.40  | 0.64 | 1.52 | 1.31   |
| Placenta            | 3.66  | 2.58 | 4.50  | 0.98   | 1.29  | 1.77 | 2.86  | 1.35 | 3.31 | 11.83  |
| Testis              | 0.89  | 0.34 | 1.01  | 0.98   | 0.10  | 0.61 | 4.06  | 0.70 | 2.97 | 0.26   |

**Supplementary Table 2: The t-statistics of expression of the major unfolded protein response genes in human disease tissues compared to normal control tissues. Data were extracted from the European Molecular Biology Laboratory-European Bioinformatics Institute database (<http://www.ebi.ac.uk/>)**

| Diseases with UPR genes differentially regulated | t-statistic |      |      |      |      |      |
|--------------------------------------------------|-------------|------|------|------|------|------|
|                                                  | BIP         | PERK | XBP1 | ERN2 | ERN1 | ATF6 |
| Acute HIV-1 infection                            | -4          | -3.6 |      |      |      |      |
| Adrenocortical carcinoma                         | -4          | -3.3 |      |      | -3.8 |      |
| Acute malaria-infected                           | 7.4         |      |      | -3   |      |      |
| Breast carcinoma                                 | 6           | 5.7  |      | -3.6 | 3.4  | 8    |
| Breast carcinoma                                 | 2.6         | 4.9  |      | -6.4 |      | 3.4  |
| Burkitts lymphoma                                |             |      | -4.8 |      | 4.2  |      |
| Chronic lymphocytic leukemia                     | -6.3        | -7.1 | 2.7  |      | -4.8 | 3.2  |
| Chromophobe renal cell carcinoma                 |             | 4.3  |      |      |      | -3.6 |
| Colon carcinoma                                  | 3.5         |      |      | 8.8  |      |      |
| Colorectal cancer                                |             |      |      | -8.4 |      | 6.1  |
| Cryptorchidism                                   | -5.9        | 3.7  |      | -2.8 |      |      |
| Dermatomyositis                                  |             | 3.4  |      |      | -4.9 | 3.1  |
| Down syndrome                                    |             | 3.6  |      | -2.9 | -3.9 |      |
| Epilepsy                                         |             | 6.2  |      | -3.1 |      |      |
| Esophageal adenocarcinoma                        | 3.8         |      |      | 3.5  |      |      |
| Gastric carcinoma                                | 3.8         | -3.9 | -4.5 |      |      |      |
| Glioblastoma                                     | 4.3         | 5.3  |      | -3.4 |      | -4.5 |
| Freidriech's ataxia                              | 3.4         | 3.4  |      | 3.4  | 3.4  |      |
| Huntington's disease                             |             | 3.5  |      |      |      | 3    |
| Intrahepatic cholangiocarcinoma                  |             |      | -5.4 |      | -3.6 |      |
| Leiomyosarcoma                                   | -5.9        | -5.1 |      | 3.8  |      |      |
| Liposarcoma                                      | 6           |      |      |      |      | 8    |
| Lung adenocarcinoma                              | 9.6         | 3.7  | 3.9  | -3.3 | -4.2 | 3.1  |
| Lung adenocarcinoma                              | 6.7         |      |      |      |      | 2.8  |
| Malignant melanoma                               | 8           | 4.3  |      |      |      | 3.2  |
| Multiple myeloma                                 | 7           | 6.8  |      |      |      | 4.5  |
| Muscle invasive carcinoma                        | 4.6         |      |      |      | -4.7 |      |
| Nasopharyngeal carcinoma                         |             |      |      | -2.9 | -3.5 |      |
| Nephrosclerosis                                  |             | 3.3  |      | -3.3 |      |      |
| Non-ischemic cardiomyopathy                      | 3.1         |      |      | -3.7 |      |      |
| Non-small cell lung cancer                       | 8.4         | 6.6  |      |      |      | -6.4 |
| Oligodendroglioma                                | -4.2        |      |      |      |      | 3.2  |
| Osteosarcoma                                     |             | 6.8  |      | 4.5  |      | 4.3  |
| Overian serous carcinoma                         | -3.4        | -3.5 |      | 3.7  | 3.8  | -4.7 |
| Pancreatic cancer                                | 3.7         | -4.4 |      | 4.3  | -3   |      |
| Periodontitis                                    | 3.2         | 7.6  |      |      | 3.5  | 8.2  |
| Pituitary cancer                                 | -3.5        |      |      |      |      | 7.6  |
| Prostate cancer                                  | -3.2        |      |      |      |      | -4.5 |
| Prostate carcinoma                               | -3          | 3.6  |      |      |      |      |
| Psoriasis                                        | -4.8        |      |      |      | 2.4  |      |
| Rheumatoid arthritis                             | 3.3         |      |      |      |      | -3.6 |
| T-cell acute lymphoblastic leukemia              | -3.1        | 3.1  |      | -3.7 | 6    | 4    |
| Testicular agenesis                              | -3.8        |      |      | 3.3  |      |      |
| Testicular seminoma                              |             | 10   | 10   |      |      | -2.5 |
| X-linked chronic granulomatous                   | -5.9        |      |      |      | 2.6  |      |
